# Supplementary material for: Addressing health literacy in patient decision aids
Source: PubMed Central journal article supplement (PMC4042520; doi:10.1186/1472-6947-13-s2-s10), 2013-11-29
Supplement: 1472-6947-13-S2-S10-S1.pdf [file 1472-6947-13-S2-S10-S1.pdf]

## Appendix 1.

### Review I: Overview of Included Studies

| Source                                                            | Design (Sample Size)                           | Population                                                                                                       | Health Literacy or Educational Levels                                                                                                                           | Control              | Intervention | Outcomes Category                                                       |
|-------------------------------------------------------------------|------------------------------------------------|------------------------------------------------------------------------------------------------------------------|-----------------------------------------------------------------------------------------------------------------------------------------------------------------|----------------------|--------------|-------------------------------------------------------------------------|
| <b>Relationship Between Literacy and Decision-Making Outcomes</b> |                                                |                                                                                                                  |                                                                                                                                                                 |                      |              |                                                                         |
| Arthur et al., 2009 [1]                                           | Cross-sectional (31 patients, 16 resident MDs) | African-American patients in 1 academic primary care office with a discussion about diabetes                     | 45% < 6 <sup>th</sup> grade on REALM                                                                                                                            | Not Applicable (N/A) | N/A          | Level of Participation in Decision                                      |
| Ciampa et al., 2010 [2]                                           | Cross-sectional                                | 3286 individuals who participated in the national Health Information Technology Survey                           | 23% low objective numeracy by single item from Lipkus numeracy scale.<br>NOTE: Subjective numeracy also assessed, but correlation poor with objective numeracy. | NA                   | NA           | Communication Quality                                                   |
| Dewalt et al., 2007 [3]                                           | Cross-sectional survey (268)                   | Type II diabetes patients attending a U.S. academic general internal medicine practice for a routine appointment | 20% < 7 <sup>th</sup> grade on REALM                                                                                                                            | N/A                  | N/A          | Desire to Participate in Medical Decision Making, Communication Quality |
| Hawley et al., 2008 [4]                                           | Cross-sectional (877)                          | Breast cancer patients from Los Angeles SEER area making a decision about surgical treatment                     | Subjective health literacy questions adapted from Chew, divided into tertiles of health literacy: 12% lowest tertile                                            | N/A                  | N/A          | Decision Regret, Communication Quality                                  |

|                             |                                                                                                  |                                                                                                               |                                                                                                                                                                                             |     |     |                                                                          |
|-----------------------------|--------------------------------------------------------------------------------------------------|---------------------------------------------------------------------------------------------------------------|---------------------------------------------------------------------------------------------------------------------------------------------------------------------------------------------|-----|-----|--------------------------------------------------------------------------|
| Hibbard et al., 2007 [5]    | Experimental design, although relationship of interest examined in cross-sectional fashion (303) | Community sample of employed-age adults making choices among hospitals                                        | Mean score on objective measure adapted from Lipkus numeracy test = 9.3 (out of 15).<br><br>S-TOFHLA measured, but scores not reported.                                                     | N/A | N/A | Patient Activation                                                       |
| Ishikawa et al., 2009 [6]   | Cross-sectional (134 pts; 4 MDs)                                                                 | Diabetic outpatients attending outpatient University-affiliated hospital metabolic clinic in Japan            | Subjective health literacy (HL) questions based on Nutbeam model.<br>Mean Functional HL: 3.4 (range 1.2-4)<br>Mean Communicative HL: 2.5 (range 1-4)<br>Mean Critical HL: 2.0 (range 1-3.5) | N/A | N/A | Question Asking, Participation in Decision Making, Communication Quality |
| Katz et al., 2007 [7]       | Cross-sectional (57 pts; 21 MDs)                                                                 | Patients attending primary care clinic in Atlanta, U.S.                                                       | 37% $\leq$ 6 <sup>th</sup> grade level on REALM                                                                                                                                             | N/A | N/A | Questions Asking                                                         |
| Lillie et al., 2007 [8]     | Cross-sectional (163)                                                                            | Stage I or II breast cancer patients at a University Breast Center making choices about adjuvant chemotherapy | Mean score on REALM = 63.<br>12% < 9 <sup>th</sup> grade on REALM                                                                                                                           | N/A | N/A | Preference for Active Participation in Decision Making                   |
| Mancuso and Ricon, 2006 [9] | Cross-sectional survey (175)                                                                     | English and Spanish speaking asthma patients attending a primary care practice in New York                    | Functional health literacy on TOFHLA:<br>Adequate: 82%<br>Marginal: 8%<br>Inadequate: 10%                                                                                                   | N/A | N/A | Desire to Participate in Treatment Decisions                             |

|                               |                        |                                                                                                           |                                                                                             |     |     |                       |
|-------------------------------|------------------------|-----------------------------------------------------------------------------------------------------------|---------------------------------------------------------------------------------------------|-----|-----|-----------------------|
| Martin et al., 2008 [10]      | Cross-sectional (628)  | 628 patients from 5 community rheumatology clinics making a decision about rheumatoid arthritis treatment | Numeracy (4 questions) from DMARD. Knowledge profile: not reported.                         | N/A | N/A | Decision Confidence   |
| Schillinger et al., 2004 [11] | Cross-sectional (408)  | Diabetic patients in family medicine or general medicine clinics at one university hospital               | Functional health literacy on S-TOFHLA: inadequate 38%, marginal 11%; adequate 51%          | N/A | N/A | Communication Quality |
| Shone, 2009 [12]              | Cross-sectional (499)  | Parents and their asthmatic children in NY school district where 40% live in poverty                      | 33% of parents with limited health literacy (<9 <sup>th</sup> grade) on REALM.              | N/A | N/A | Communication Quality |
| Smith et al., 2010 [13]       | Cross-sectional (6024) | Individuals who participated in the national Health Information Technology Survey                         | 37% with low subjective numeracy from single item about confidence with medical statistics. | N/A | N/A | Communication Quality |
| Sudore et al., 2009 [14]      | Cross-sectional (771)  | Primary care or cardiology patients                                                                       | 51% with limited (inadequate or marginal) health literacy on S-TOFHLA                       | N/A | N/A | Communication Quality |
| Sudore et al., 2010 [15]      | Cross-sectional (205)  | Multiethnic general medicine outpatients at a county hospital making a decision about life support        | Functional health literacy on S-TOHFLA: Inadequate: 22% Marginal: 18% Adequate: 60%         | N/A | N/A | Decision Uncertainty  |
| Torres and Marks, 2009 [16]   | Cross-sectional (106)  | 106 women recruited from a family clinic and making decisions about hormone replacement therapy           | Functional health literacy on S-TOFHLA: Inadequate-46% Marginal-18% Adequate-36%            | N/A | N/A | Decision Confidence   |
| Wynia and                     | Cross-                 | Patients attending one of                                                                                 | 57% had limited health                                                                      | N/A | N/A | Communication quality |

---

|                   |                  |                                             |                                                                         |
|-------------------|------------------|---------------------------------------------|-------------------------------------------------------------------------|
| Osborn, 2010 [17] | sectional (2116) | 13 healthcare settings (clinic or hospital) | literacy, averaging across 3 Chew subjective health literacy questions. |
|-------------------|------------------|---------------------------------------------|-------------------------------------------------------------------------|

---

**Effect of Health Literacy Interventions on Decision-Making Outcomes**

---

|                            |                             |                                                                                                           |                                                                                   |     |                                                                                                     |                      |
|----------------------------|-----------------------------|-----------------------------------------------------------------------------------------------------------|-----------------------------------------------------------------------------------|-----|-----------------------------------------------------------------------------------------------------|----------------------|
| Volandes et al., 2010 [18] | Quasi-exp. (pre-post) (146) | Patients attending urban and suburban primary care clinics in Boston (affiliated with teaching hospitals) | 18% ≤ 6 <sup>th</sup> grade on REALM<br>21% grade 7-8 on REALM<br>61% > 9th grade | N/A | A video of a patient with advanced dementia, depicting the important features of advanced dementia. | Decision Uncertainty |
|----------------------------|-----------------------------|-----------------------------------------------------------------------------------------------------------|-----------------------------------------------------------------------------------|-----|-----------------------------------------------------------------------------------------------------|----------------------|

---

*Abbreviations Used:*

- DMARD: Disease Modifying Anti-Rheumatic Drugs
- HL: Health Literacy
- MDs: Medical Doctors
- REALM: Rapid Estimate of Adult Literacy in Medicine
- SEER: Surveillance Epidemiology and End Results
- S-TOFHLA: Short-Test of Functional Health Literacy in Adults
- TOFHLA: Test of Functional Health Literacy in Adults

**References**

1. Arthur SA, Geiser HR, Arriola KRJ, Kripalani S: **Health literacy and control in the medical encounter: a mixed-methods analysis.** *J Natl Med Assoc* 2009, **101**:677-683.
2. Ciampa PJ, Osborn CY, Peterson NB, Rothman RL: **Patient numeracy, perceptions of provider communication, and colorectal cancer screening utilization.** *J Health Commun* 2010, **15**(Suppl 3):157-168.

3. DeWalt DA, Boone RS, Pignone MP: **Literacy and its relationship with self-efficacy, trust, and participation in medical decision making.** *Am J Health Behav* 2007, **31**:S27-S35.
4. Hawley ST, Janz NK, Hamilton A, Griggs JJ, Alderman AK, Mujahid M, Katz SJ: **Latina patient perspectives about informed treatment decision making for breast cancer.** *Patient Educ Couns* 2008, **73**:363-370.
5. Hibbard JH, Peters E, Dixon A, Tusler M: **Consumer competencies and the use of comparative quality information: it isn't just about literacy.** *Med Care Res Rev* 2007, **64**:379-394.
6. Ishikawa H, Yano E, Fujimori S, Kinoshita M, Yamanouchi T, Yoshikawa M, Yamazaki Y, Teramoto T: **Patient health literacy and patient-physician information exchange during a visit.** *Fam Prac* 2009, **26**:517-523.
7. Katz M, Jacobson T, Veledar E, Kripalani S: **Patient literacy and question-asking behavior during the medical encounter: a mixed-methods analysis.** *J Gen Intern Med* 2007, **22**:782-786.
8. Lillie SE, Brewer NT, O'Neill SC, Morrill EF, Dees EC, Carey LA, Rimer BK: **Retention and use of breast cancer recurrence risk information from genomic tests: the role of health literacy.** *Cancer Epidemiol Biomarkers Prev* 2007, **16**:249-255.
9. Mancuso CA, Rincon M: **Asthma patients' assessments of health care and medical decision making: the role of health literacy.** *J Asthma* 2006, **43**:41-44.
10. Martin RW, Head AJ, Rene J, Swartz TJ, Fiechtner JJ, McIntosh BA, Holmes-Rovner M: **Patient decision-making related to antirheumatic drugs in rheumatoid arthritis: the importance of patient trust of physician.** *J Rheumatol* 2008, **35**:618-624.
11. Schillinger D, Bindman A, Wang F, Stewart A, Piette J: **Functional health literacy and the quality of physician-patient communication among diabetes patients.** *Patient Educ Couns* 2004, **52**:315-323.
12. Shone LP, Conn KM, Sanders L, Halterman JS: **The role of parent health literacy among urban children with persistent asthma.** *Patient Educ Couns* 2009, **75**:368-375.
13. Smith SG, Wolf MS, von Wagner C: **Socioeconomic status, statistical confidence, and patient-provider communication: an analysis of the Health Information National Trends Survey (HINTS 2007).** *J Health Commun* 2010, **15**(Suppl 3):169-185.

14. Sudore RL, Landefeld CS, Perez-Stable EJ, Bibbins-Domingo K, Williams BA, Schillinger D: **Unraveling the relationship between literacy, language proficiency, and patient-physician communication.** *Patient Educ Couns* 2009, **75**:398-402.
15. Sudore RL, Schillinger D, Knight SJ, Fried TR: **Uncertainty about advance care planning treatment preferences among diverse older adults.** *J Health Commun* 2010, **15**(Suppl 2):159-171.
16. Torres RY, Marks R: **Relationships among health literacy, knowledge about hormone therapy, self-efficacy, and decision-making among postmenopausal health.** *J Health Commun* 2009, **14**:43-55.
17. Wynia MK, Osborn CY: **Health literacy and communication quality in health care organizations.** *J Health Commun* 2010, **15**:102-115.
18. Volandes AE, Barry MJ, Chang YC, Paasche-Orlow MK: **Improving decision making at the end of life with video images.** *Med Decis Making* 2010, **30**:29-34.
